# Supplementary material for: Study of thioglycosylation in ionic liquids
Source: Beilstein J Org Chem. 2006 Jun 27;2:12. doi: 10.1186/1860-5397-2-12 (PMC1540430; doi:10.1186/1860-5397-2-12)
Supplement: File 1 — contains experimental details. [file Beilstein_J_Org_Chem-02-12-s001.doc]

**Typical procedure**: All the ionic liquid solvents used in this study were purchased from Aldrich-Fluka, theywere dried together with 4Ǻ molecular sieves under reduced pressure at 70oC for several hours.The donor (0.5 mmol) and acceptor (1.0 mmol) were dissolved in ionic liquid(0.7-2.0 ml). The mixture was stirred under argon at ambient temperature, methyl trifluoromethane sulfonate (2 equiv.) was added in 30 min. After stirring at 25 oC for 48 h, the mixture was quenched with TEA, and extracted with toluene (6 x 3 ml), the organic layer was then washed with brine and water, dried over Na2SO4 and the combined extracts were removed in *vacuo*. Purification of the residue by column chromatography gave the glycosides.
